# Supplementary material for: Platinum complexes having redox-active PPh2CCFc and/or CCFc as terminal or bridging ligands
Source: Royal Society of Chemistry journal article supplement (doi:10.1039/b822171e), 2009-01-01
Supplement: b822171e.pdf [file b822171e.pdf]

Supplementary Information

**Platinum complexes having redox-active  $\text{PPh}_2\text{C}\equiv\text{CFc}$  and/or  $\text{C}\equiv\text{CFc}$  as terminal or bridging ligands.**

Álvaro Díez, Elena Lalinde,\* M. Teresa Moreno\* and Sergio Sánchez

*Departamento de Química-Grupo de Síntesis Química de La Rioja, UA-CSIC,*

*Universidad de La Rioja, 26006, Logroño, Spain.*

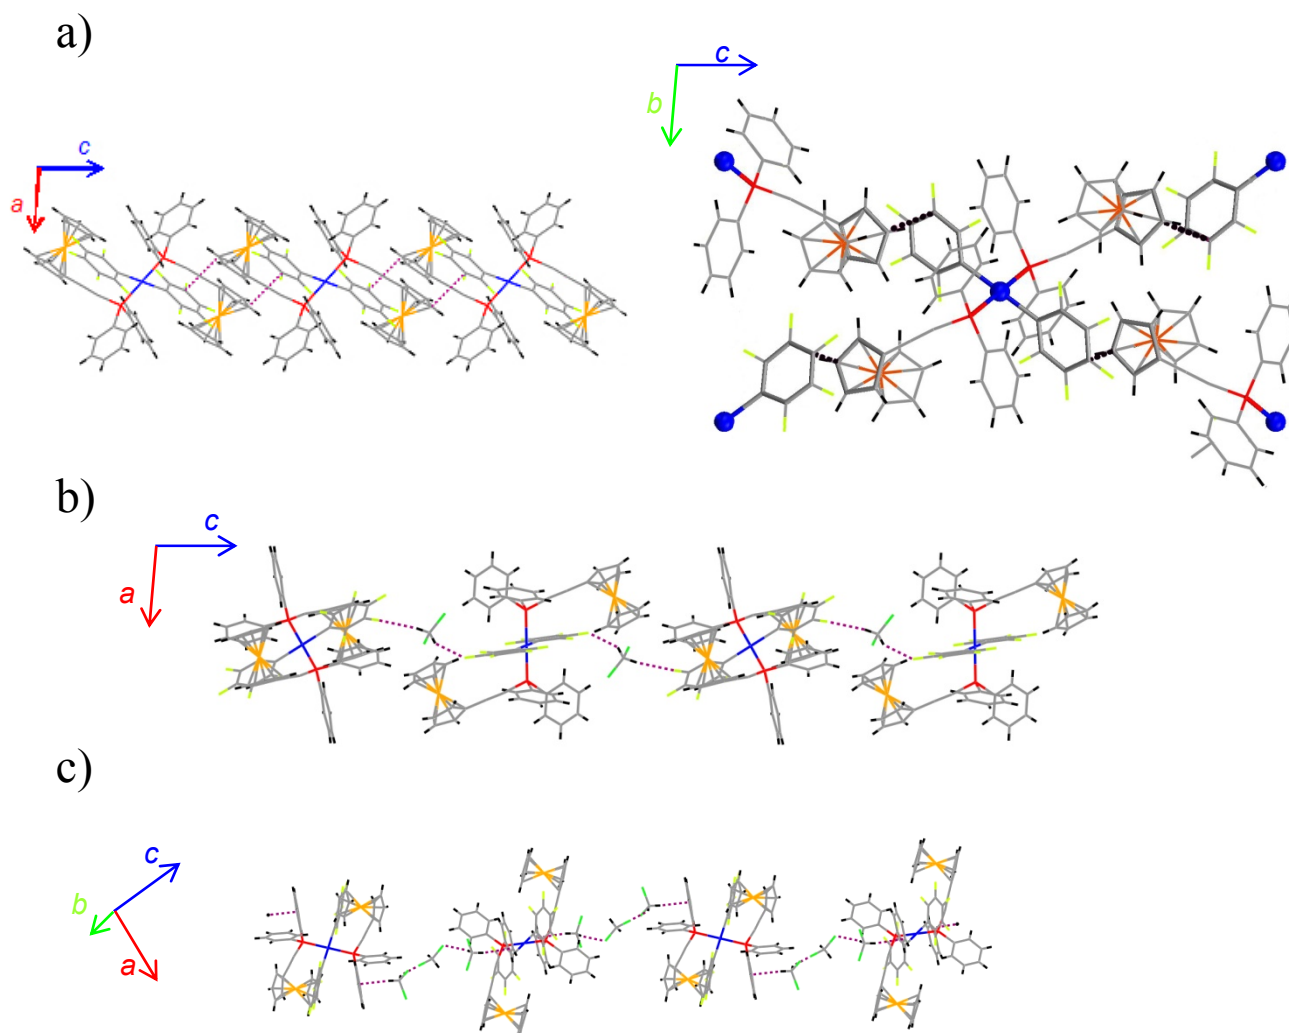

**Figure S1.** a) View of the  $\pi\cdots\pi$  interactions between the  $\text{C}_6\text{F}_5$  and Cp rings of adjacent molecules of complex 2 (left), which give rise to a bidimensional network along the  $b$  and  $c$  axes (right). The layers are additionally connected by the  $\text{CH}_2\text{Cl}_2$  crystallization

solvent molecules, giving rise to a three-dimensional network. Two different types of contacts are observed involving one (F...H 2.455(4) Å; b), or three (Cl...H 2.495(8) Å and C(Ph)...H(CH<sub>2</sub>Cl<sub>2</sub>) 2.589(7) Å; c) molecules of solvent.

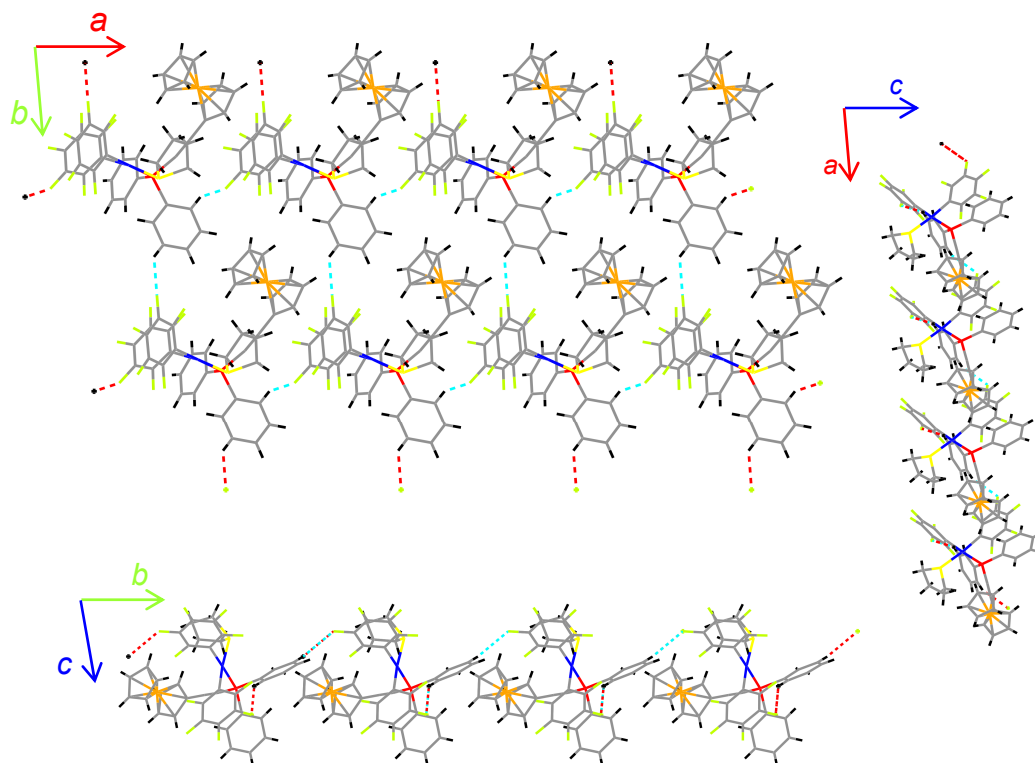

**Figure S2.** The molecular structure of complex **3** shows weak intermolecular contacts with distances F...H(Ph) (2.525(5), 2.552(4) Å), F...H-C(tht) (2.615(5), 2.656(4) Å), F...H-C(Fc) (2.622(5) Å), F...C(Fc) (3.14(2) Å), C(Fc)-H...C(Ph) (2.893(6) Å), C(Fc)-H...C(Fc) (2.89 Å), C(Ph)-H...C(Fc) (2.882(9), 2.81(2) Å), C(tht)-H...C(C<sub>6</sub>F<sub>5</sub>) (2.815(8) Å), C(Fc)-H...H-C(Fc) (2.32 Å).

**Thermal behavior of complex 9:**

Prolongated heating in solid state ( $\sim 140\text{ }^{\circ}\text{C}$ ) or in solution of complex **9** ( $\text{CHCl}_3$  or Toluene) evolves with considerable decomposition and the only stable phosphorous containing species observed by  $^{31}\text{P}\{^1\text{H}\}$  NMR spectroscopy was the precursor. However, by heating at  $70^{\circ}\text{C}$  a toluene solution of **9** for a short time (3 min), the expected signals ( $^{31}\text{P}\{^1\text{H}\}$  and  $^{19}\text{F}$  NMR, see Experimental Section) due to the double inserted product **9'** (Scheme S1, ii) are observed in the final reaction mixture, together with other decomposition products, including the precursor **9**. The most characteristic signals in the  $^{19}\text{F}$  NMR spectrum corresponds to the inserted  $\text{C}_6\text{F}_5$  group (C- $\text{C}_6\text{F}_5$ , A), for which the separation between the two F-*ortho* resonances and the F-*para* is reduced to  $\sim 16$  ppm ( $-136.6$ ,  $-137.4$  o- $\text{F}^{\text{A}}$ ,  $-153.8$  p- $\text{F}^{\text{A}}$ ) and in the  $^{31}\text{P}\{^1\text{H}\}$  NMR spectrum the expected low-field signals ( $\delta$  21.11, 33.71 ppm) with platinum satellites, in accordance with previous results.<sup>S1, S2</sup> All attempts to isolate **9'** as pure solid from the mixture have been unsuccessful.

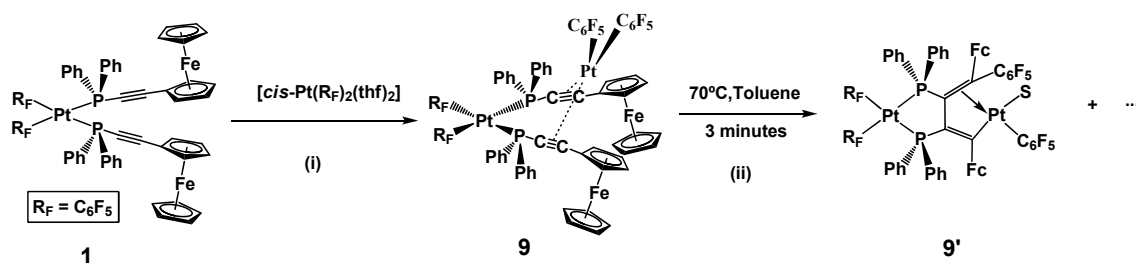

Scheme S1

- S1 J. P. H. Charmant, J. Forniés, J. Gómez, E. Lalinde, M. T. Moreno, A. G. Orpen and S. Solano, *Angew. Chem., Int. Ed. Engl.*, 1999, **38**, 3058.
- S2 I. Ara, J. Forniés, A. García, J. Gómez, E. Lalinde and M. T. Moreno, *Chem. Eur. J.*, 2002, **8**, 3698.

Experimental Section:

**Heating of  $[\{\text{Pt}(\text{C}_6\text{F}_5)_2(\mu\text{-}1\kappa^{\text{P}}:2\eta^2\text{-PPh}_2\text{C}\equiv\text{CFc})_2\}\text{Pt}(\text{C}_6\text{F}_5)_2]$  **9**. Formation of  $[\text{Pt}(\text{C}_6\text{F}_5)(\text{S})\mu\text{-}\{\text{C}(\text{Fc})=\text{C}(\text{PPh}_2)\text{C}(\text{PPh}_2)=\text{C}(\text{Fc})(\text{C}_6\text{F}_5)\}\text{Pt}(\text{C}_6\text{F}_5)_2]$  **9'**.** Monitoring by multinuclear NMR spectra of a solution of **9** heating in toluene for 3 min reveals the presence of signals corresponding to **9'**, together with other decomposition products including **9**. Data for **9'** extracted from the NMR spectra of the mixture:  $\delta_{\text{P}}$  (121.5 MHz;  $\text{CDCl}_3$ ; 20°C) 21.11 (s,  $^1J_{\text{Pt-P}}$  2336 Hz), 33.71 (s,  $^1J_{\text{Pt-P}}$  2324 Hz);  $\delta_{\text{F}}$  (282.4 MHz;  $\text{CDCl}_3$ ; 20°C) -113.5 (m, 1F, *o*-F), -114.1 (m, 1F, *o*-F), -115.2 (m, 1F, *o*-F), -115.8 (m, 1F, *o*-F) -117.2 (m, 2F, *o*-F), -136.6 (s, 1F, *o*-F<sup>A</sup>), -137.4 (s, 1F, *o*-F<sup>A</sup>), -153.8 (t, 1F, *p*-F<sup>A</sup>), -158.2 (t, 1F), -160.8 (m, 1F), -161.7 (m, 2F, *p*-F), -162.3 (m, 1F), -136.1 (m, 2F), -163.6 (m, 4F, *m*-F).

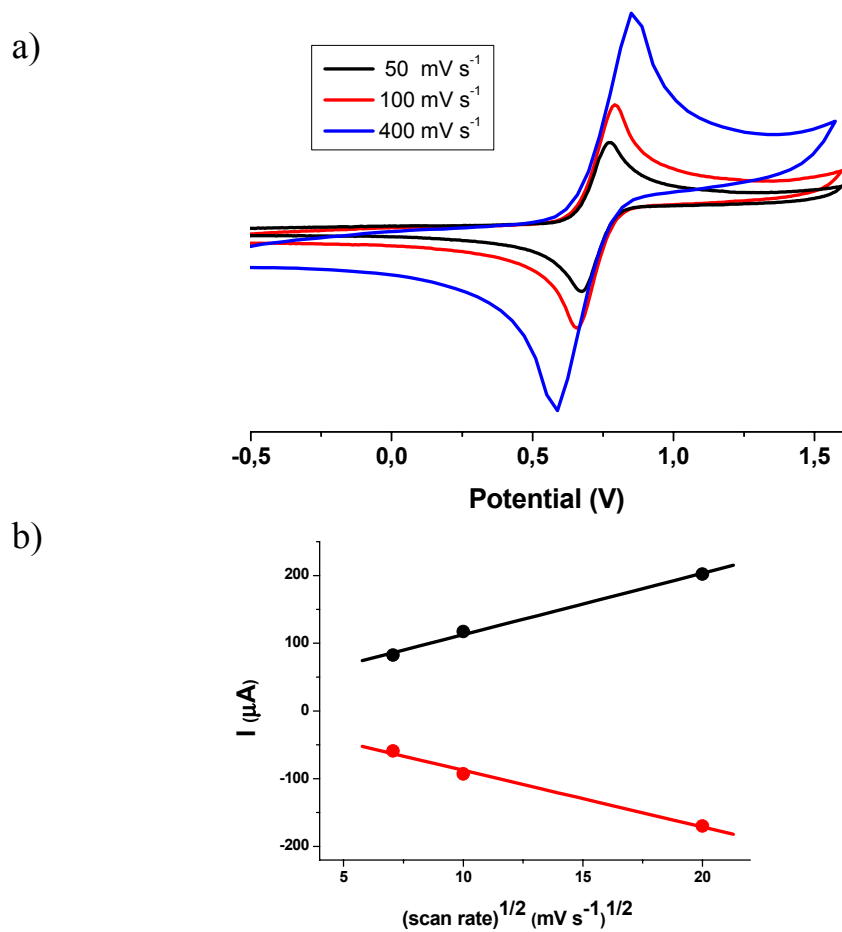

**Figure S3.** (a) CVs of complex **4** in CH<sub>2</sub>Cl<sub>2</sub> solution at different sweep rates. (b) Quasireversible peak current variation with the square root of the scan rate, which shows a linear trend.

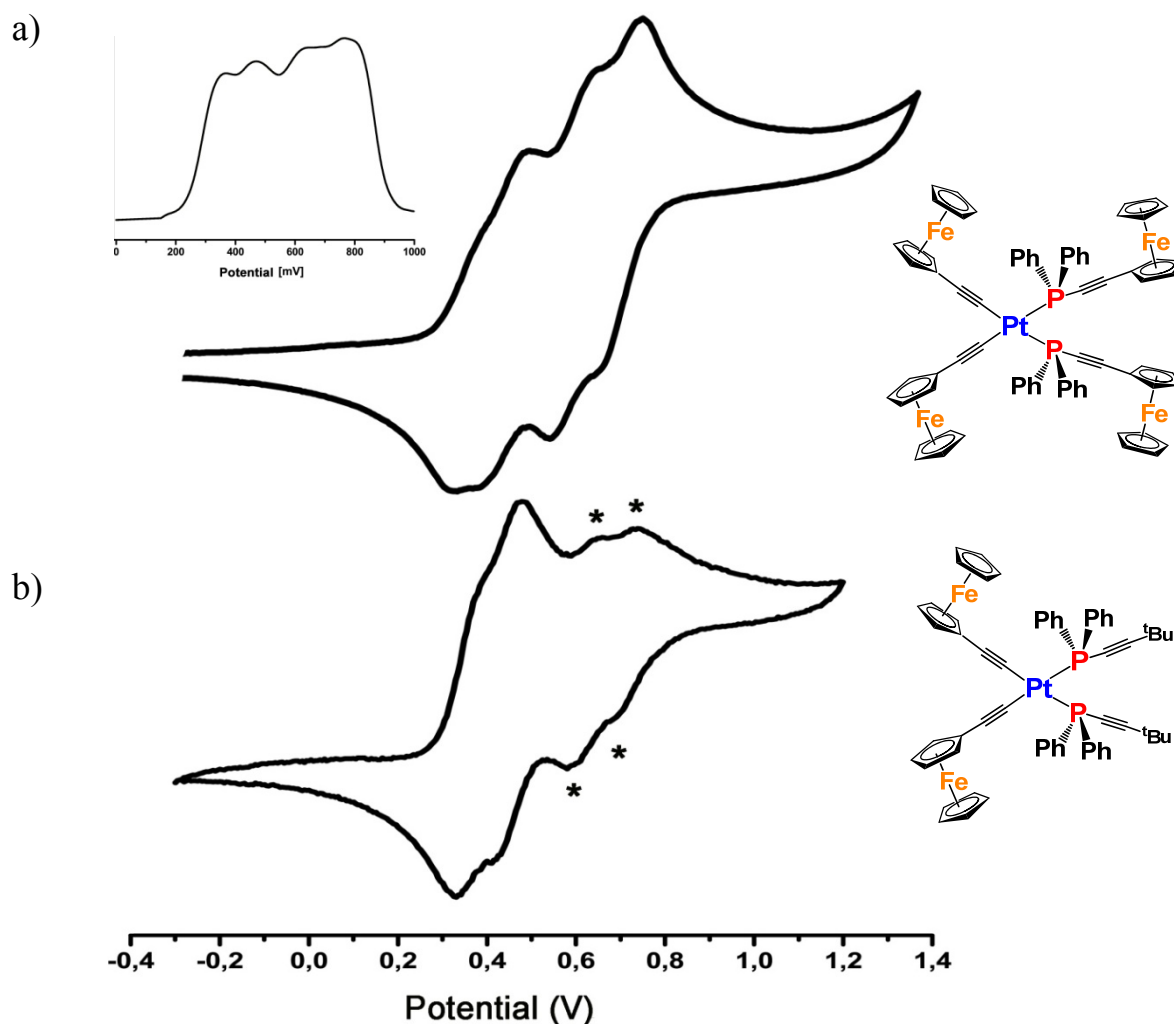

**Figure S4.** CV and DPV of complex **5a** (a) in  $\text{CH}_2\text{Cl}_2$  showing four unresolved waves and CV of complex **5c** (b), which shows additional waves due to by-products (\*) at  $100 \text{ mV s}^{-1}$ .

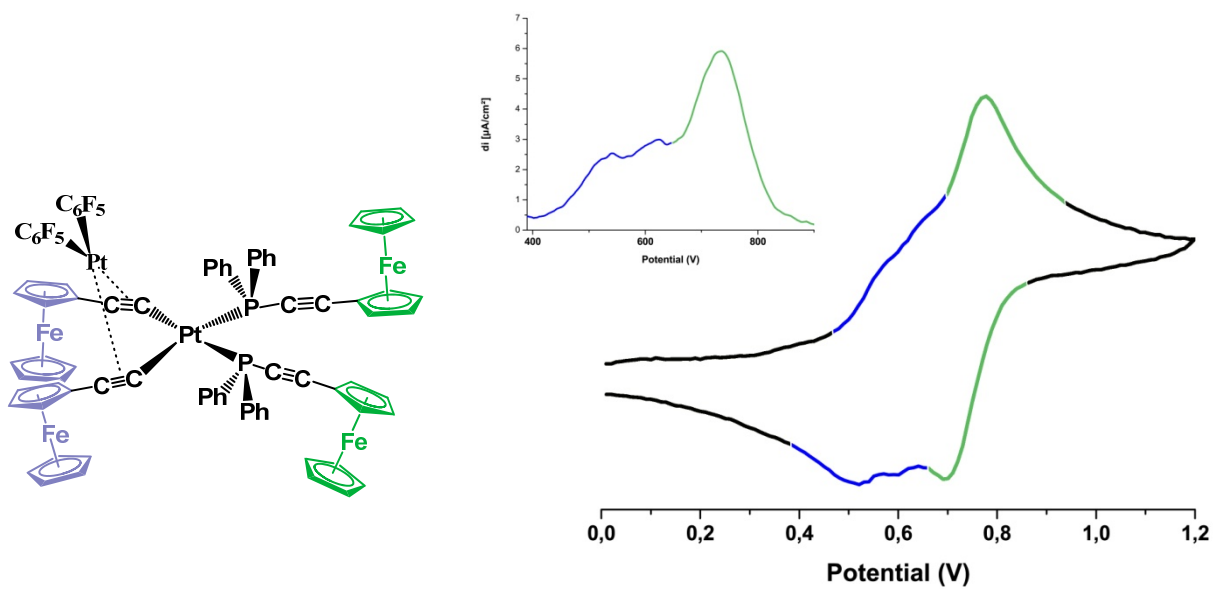

**Figure S5.** CV (and DPV) of complex **10a** in CH<sub>2</sub>Cl<sub>2</sub> at a scan rate of 100 mv s<sup>-1</sup>
